# Supplementary material for: Environmental behaviors of ( E ) pyriminobac-methyl in agricultural soils
Source: Copernicus journal article supplement (doi:10.5194/soil-8-237-2022), 2022-03-31
Supplement: Supplementary file 1 [file soil-8-237-2022-supplement.pdf]

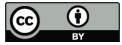

*Supplement of*

## **Environmental behaviors of (*E*) pyriminobac-methyl in agricultural soils**

**Wenwen Zhou et al.**

*Correspondence to:* Baotong Li (btli666@163.com)

The copyright of individual parts of the supplement might differ from the article licence.

20

21 **Table S1**

22 Basic physicochemical properties of the selected soils.

| Soil sample | Soil type <sup>a</sup> | Latitude/<br>Longitude | Location     | Texture    | pH   | OM <sup>b</sup><br>(%) | CEC <sup>c</sup><br>(cmol kg <sup>-1</sup> ) | Clay<br>(%) |
|-------------|------------------------|------------------------|--------------|------------|------|------------------------|----------------------------------------------|-------------|
| S1          | Phaeozem               | 41°36' N/<br>127°53' E | Heilongjiang | Sandy loam | 6.38 | 4.64                   | 30.36                                        | 64.42       |
| S2          | Anthrosol              | 29°14'N/<br>121°48' E  | Zhejiang     | Loam       | 7.85 | 1.66                   | 12.90                                        | 42.10       |
| S3          | Ferralsol              | 28°46' N/<br>115°36' E | Jiangxi      | Sandy loam | 5.21 | 0.35                   | 11.99                                        | 15.67       |
| S4          | Alisol                 | 35°06' N/<br>118°21' E | Shandong     | Sandy loam | 6.78 | 1.20                   | 12.19                                        | 23.47       |
| S5          | Plinthosol             | 19°32'N/<br>110°10' E  | Hainan       | Silt loam  | 5.79 | 0.88                   | 11.00                                        | 43.83       |

23 <sup>a</sup> Soil classification according to the World Reference Base for Soil Resources.

24 <sup>b</sup> OM: Organic matter content.

25 <sup>c</sup> CEC: Cation exchange capacity

26

27

28

29

30

31

32

33

34 The selective ion chromatograms of EPM in acetonitrile, paddy water, soil samples spiked at 0 and 0.1 mg kg<sup>-1</sup>  
35 were shown in Fig. S2 (A-G). The results of linearity, LOD, LOQ, and matrix effect were summarized in Table  
36 S2. The calibration curve of EPM (0.005, 0.01, 0.05, 0.1, 0.5, and 1mg kg<sup>-1</sup>) showed a high correlation  
37 coefficient ( $R^2 > 0.994$ ) in all matrices. To evaluate its specificity, the method was applied to blank samples of  
38 different matrices. No interference was detected during the retention time. The LODs of EPM ranged from  
39 0.001 to 0.013 mg kg<sup>-1</sup>, while the LOQs were 0.004 – 0.049 mg kg<sup>-1</sup> for all samples. All matrices had moderate  
40 matrix effects ( $ME < 10\%$ ), thus, the matrix standard curve could be ignored (Li et al., 2019).

41 Five parallel tests were conducted for each matrix spiked with EPM at three different levels (0.005, 0.01, and  
42 0.1 mg kg<sup>-1</sup>). After sample pretreatment by the optimized QuEChERS procedure, the recovery of EPM in the  
43 various matrices ranged between 90.95% and 110.12%, with RSDs of 1.3% – 9.8% for repeatability (Table S3),  
44 and with RSDs of 3.63% – 8.49% for repeatability (Table S4). Five parallel tests were conducted for the blank  
45 matrix of soil samples spiked at 0.005, 0.01 and 0.1 mg kg<sup>-1</sup> of EPM, respectively, and the chromatograms were  
46 shown in Fig. S3 (A-C). Chromatograms of EPM on the five columns of one batche and on the five columns of  
47 the different batches were shown in Fig. S4 (A-B). Thus, the developed analytical method fulfills the  
48 requirements of SANTE/11813/2017 guidelines and fall within the range of 70–120 % for recovery and less  
49 than 20% for RSD (Sante, 2017).

50

#### 51 References:

52 Li, W., Zhang, Y., Jia, H., Zhou, W., Li, B., and Huang, H.: Residue analysis of tetraniliprole in rice and related  
53 environmental samples by HPLC/MS, *Microchemical Journal*, 150,  
54 104168, <https://doi.org/10.1016/j.microc.2019.104168>, 2019.

55 SANTE: Guidance document on analytical quality control and method validation procedures for  
56 pesticide residues analysis in food and feed, 2017.

57

58

59 **Table S2**

60 Linear regression equation, limit of detection (LOD), limit of quantification (LOQ), and matrix effect  
61 for EPM in various matrices

| Matrices     | Linear Equation         | R <sup>2</sup> | LOD<br>(mg kg <sup>-1</sup> ) | LOQ<br>(mg kg <sup>-1</sup> ) | Matrix effect<br>(%) |
|--------------|-------------------------|----------------|-------------------------------|-------------------------------|----------------------|
| Acetonitrile | $y = 254868 x + 2080.3$ | 0.9999         | -                             | -                             | -                    |
| Paddy water  | $y = 188630 x + 3059.2$ | 0.9983         | 0.012                         | 0.045                         | 1.84                 |
| S1           | $y = 172440 x + 3779.2$ | 0.9961         | 0.002                         | 0.008                         | 1.86                 |
| S2           | $y = 141678 x + 2501.3$ | 0.9949         | 0.001                         | 0.004                         | 1.36                 |
| S3           | $y = 138732 x + 492.6$  | 0.9985         | 0.011                         | 0.042                         | 1.01                 |
| S4           | $y = 1662958x + 2004.9$ | 0.9990         | 0.0021                        | 0.0069                        | 1.52                 |
| S5           | $y = 152673 x + 1517.1$ | 0.9991         | 0.013                         | 0.049                         | 1.48                 |

62

63

64

65

66

67

68

69

70

71

72

73

74 **Table S3**

75 Recovery and relative standard deviation (RSD) of EPM in various matrices spiked at levels of 0.005, 0.01,  
76 and 0.1 mg kg<sup>-1</sup> (n=5)

| Matrices    | Spiked level           | Recovery(%) |        |        |        |        | Mean recovery | RSD  |
|-------------|------------------------|-------------|--------|--------|--------|--------|---------------|------|
|             | (mg kg <sup>-1</sup> ) | 1           | 2      | 3      | 4      | 5      | (%)           | (%)  |
| Paddy water | 0.005                  | 93.51       | 107.03 | 91.03  | 90.95  | 104.35 | 97.37         | 7.93 |
|             | 0.01                   | 91.96       | 96.10  | 97.76  | 101.58 | 110.12 | 99.50         | 6.90 |
|             | 0.1                    | 93.93       | 92.88  | 103.45 | 108.15 | 109.67 | 101.62        | 7.72 |
| S1          | 0.005                  | 104.94      | 99.57  | 100.35 | 102.84 | 102.35 | 102.01        | 2.09 |
|             | 0.01                   | 108.01      | 93.85  | 94.10  | 94.22  | 104.79 | 98.99         | 6.93 |
|             | 0.1                    | 98.22       | 102.26 | 108.82 | 97.82  | 97.26  | 100.88        | 4.82 |
| S2          | 0.005                  | 100.73      | 109.29 | 91.89  | 93.56  | 108.38 | 100.77        | 8.02 |
|             | 0.01                   | 102.67      | 95.22  | 93.22  | 103.30 | 102.91 | 99.46         | 4.87 |
|             | 0.1                    | 93.09       | 95.27  | 109.84 | 90.19  | 95.39  | 96.76         | 7.87 |
| S3          | 0.005                  | 91.10       | 91.72  | 104.98 | 107.54 | 104.22 | 99.91         | 7.87 |
|             | 0.01                   | 92.17       | 109.97 | 108.62 | 91.22  | 97.30  | 99.86         | 8.95 |
|             | 0.1                    | 108.94      | 92.88  | 91.52  | 95.18  | 95.98  | 96.90         | 7.18 |
| S4          | 0.005                  | 103.74      | 103.22 | 101.45 | 99.57  | 104.34 | 102.46        | 1.90 |
|             | 0.01                   | 98.65       | 98.07  | 99.34  | 97.45  | 94.12  | 97.53         | 2.08 |
|             | 0.1                    | 100.20      | 93.41  | 90.42  | 91.05  | 91.07  | 93.23         | 4.35 |
| S5          | 0.005                  | 100.09      | 98.40  | 104.96 | 105.42 | 97.88  | 101.35        | 3.55 |
|             | 0.01                   | 97.21       | 102.68 | 94.47  | 96.10  | 92.12  | 96.52         | 4.09 |
|             | 0.1                    | 100.09      | 92.77  | 93.50  | 93.92  | 98.87  | 95.83         | 3.53 |

77

78

79 **Table S4**

80 Reproducibility of the retention time, precursor signal, and retention factor of EPM

|                  | RSD (%)                          |                                       |
|------------------|----------------------------------|---------------------------------------|
|                  | Column-to-column reproducibility | Batch-to-batch reproducibility on six |
|                  | on five columns                  | batches                               |
| Retention time   | 4.89                             | 6.01                                  |
| Precursor signal | 7.27                             | 8.49                                  |
| Retention factor | 3.63                             | 5.87                                  |

81

82

83

84

85

86

87

88

89

90

91

92

93

94

95 **Table S5**

96 Results of the linear correlation analysis conducted on the Freundlich adsorption–desorption constants for EPM and the soil physicochemical properties.

| Parameter             | Adsorption |                              |          |        |        | Desorption |                              |          |         |         |
|-----------------------|------------|------------------------------|----------|--------|--------|------------|------------------------------|----------|---------|---------|
|                       | pH         | CEC (cmol kg <sup>-1</sup> ) | Clay (%) | OM (%) | OC (%) | pH         | CEC (cmol kg <sup>-1</sup> ) | Clay (%) | OM (%)  | OC (%)  |
| Slope                 | 0.0007     | 0.6078                       | 1.1095   | 0.1197 | 0.0694 | 0.0558     | 4.7356                       | 9.1508   | 0.9421  | 0.5465  |
| Intercept             | 6.4075     | 10.7430                      | 28.8710  | 0.7724 | 0.4481 | 6.2782     | 5.1749                       | 17.5830  | -0.3455 | -0.2004 |
| <i>P</i>              | 0.9880     | 0.0006                       | 0.1170   | 0.0110 | 0.0110 | 0.8830     | 0.0120                       | 0.1080   | 0.0240  | 0.0240  |
| <i>R</i> <sup>2</sup> | 0.0008     | 0.9925                       | 0.6144   | 0.9160 | 0.9160 | 0.0085     | 0.9107                       | 0.6317   | 0.8582  | 0.8582  |

97 Notes: CEC: soil cation exchange capacity; OC: soil organic carbon content; OM: soil organic matter content.

98

99

100

101

102

103

104

105 **Table S6**106 Linear correlation analysis between the half-life ( $t_{1/2}$ ) of EPM and the soil physicochemical properties under different conditions.

| Parameter             | Aerobic |                                 |          |           | Anaerobic |                                 |          |           | Sterilized |                                 |          |           |
|-----------------------|---------|---------------------------------|----------|-----------|-----------|---------------------------------|----------|-----------|------------|---------------------------------|----------|-----------|
|                       | pH      | CEC (cmol<br>kg <sup>-1</sup> ) | Clay (%) | OM<br>(%) | pH        | CEC (cmol<br>kg <sup>-1</sup> ) | Clay (%) | OM<br>(%) | pH         | CEC (cmol<br>kg <sup>-1</sup> ) | Clay (%) | OM<br>(%) |
| Slope                 | -0.0593 | -0.9124                         | -2.0192  | -0.2032   | -0.0775   | -1.0042                         | -2.1455  | -0.2276   | -0.4809    | -0.7979                         | -4.6080  | -0.3591   |
| Intercept             | 9.3711  | 61.3570                         | 138.9700 | 11.9190   | 10.4450   | 68.0520                         | 149.7700 | 13.6160   | 36.6770    | 65.9150                         | 327.9800 | 24.3530   |
| <i>P</i>              | 0.4160  | 0.0400                          | 0.0650   | 0.0050    | 0.3450    | 0.0640                          | 0.1130   | 0.0140    | 0.0170     | 0.7590                          | 0.4200   | 0.4830    |
| <i>R</i> <sup>2</sup> | 0.2276  | 0.8022                          | 0.7299   | 0.9478    | 0.2939    | 0.7343                          | 0.6226   | 0.8983    | 0.8850     | 0.0363                          | 0.2248   | 0.1750    |



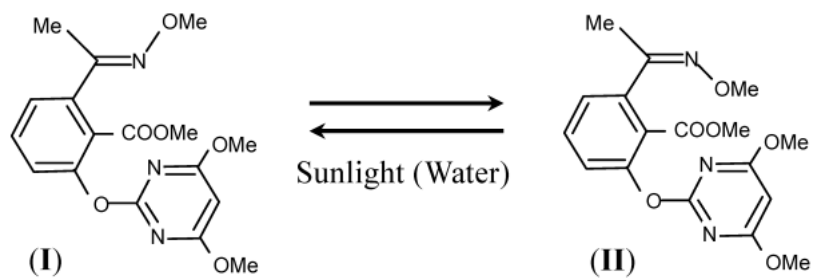

107

108 **Fig. S1** Chemical structure of EPM(I) and ZPM(II).

109

110

111

112

113

114

115

116

117

118

119

120

121

122

123

124

125

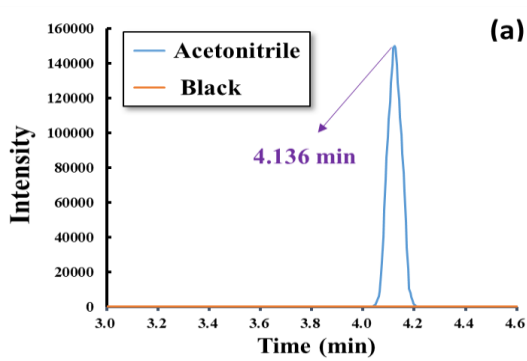

126

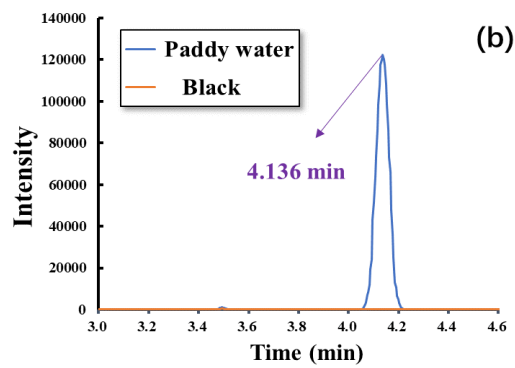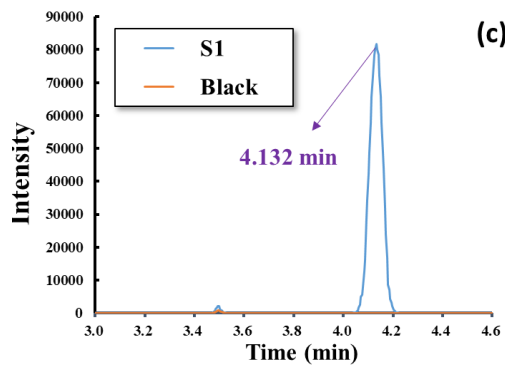

127

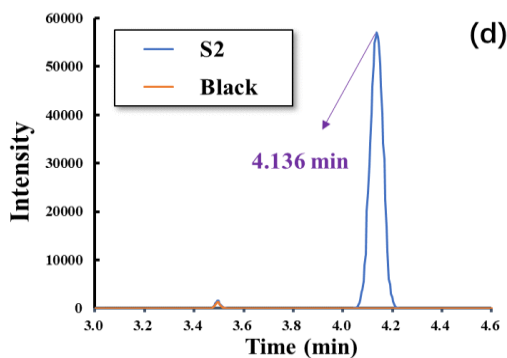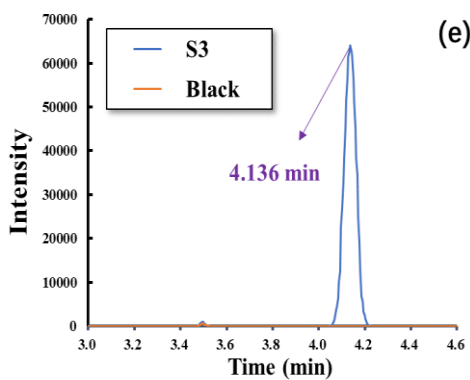

128

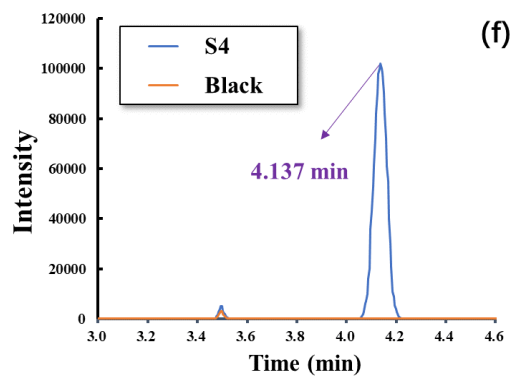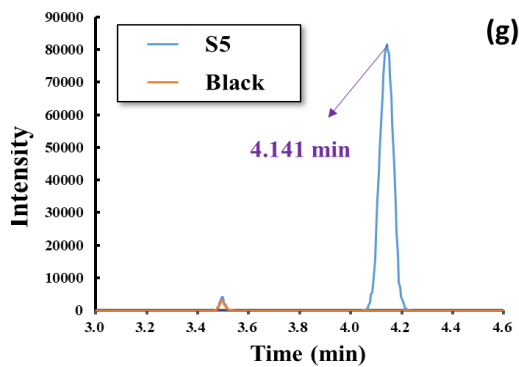

129

130 **Fig. S2** The selective ion chromatograms of EPM spiked at 0 and 0.1 mg kg<sup>-1</sup>(A: acetonitrile; B: paddy  
131 water; C: S1; D: S2; E: S3; F: S4; G: S5) (S1 to S5 are defined in Table 1)

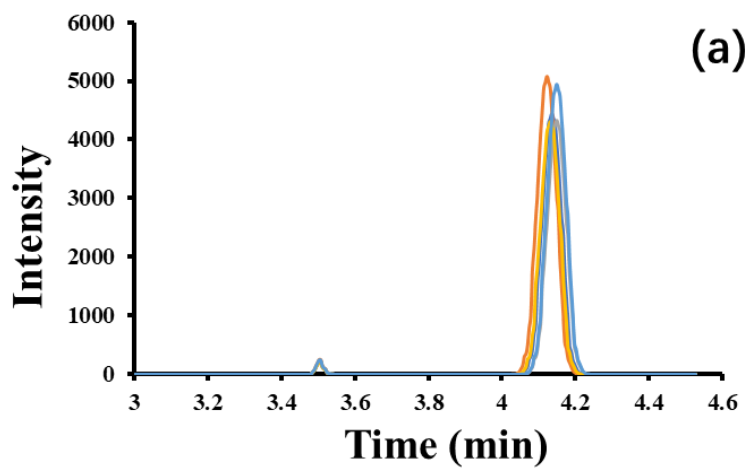

132

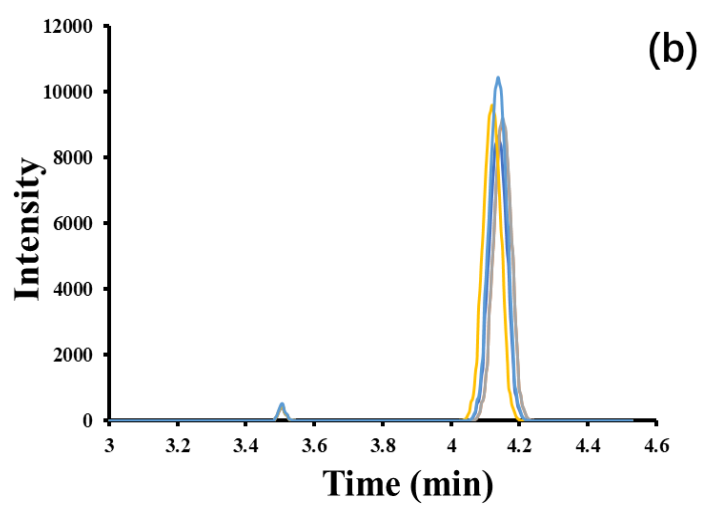

133

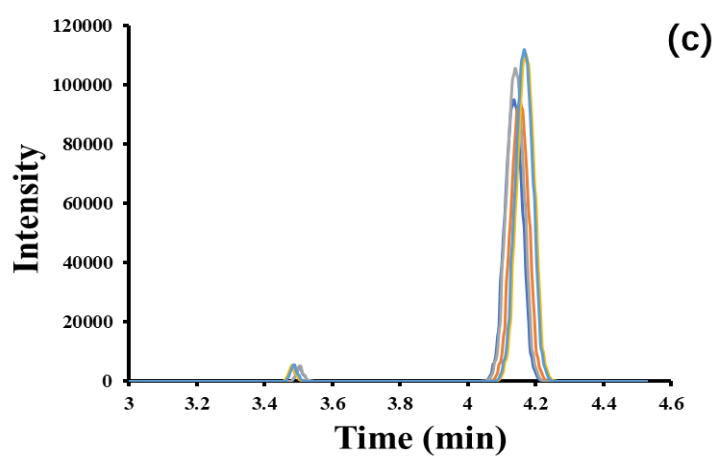

134

135 **Fig. S3** Recovery of EPM in S1 sample spiked at levels of 0.005(a), 0.01(b), and 0.1(c) mg kg<sup>-1</sup> (n=5)

136

137

138

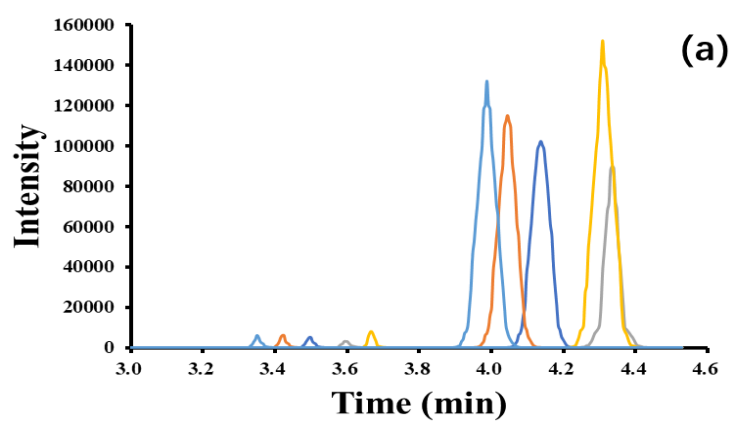

139

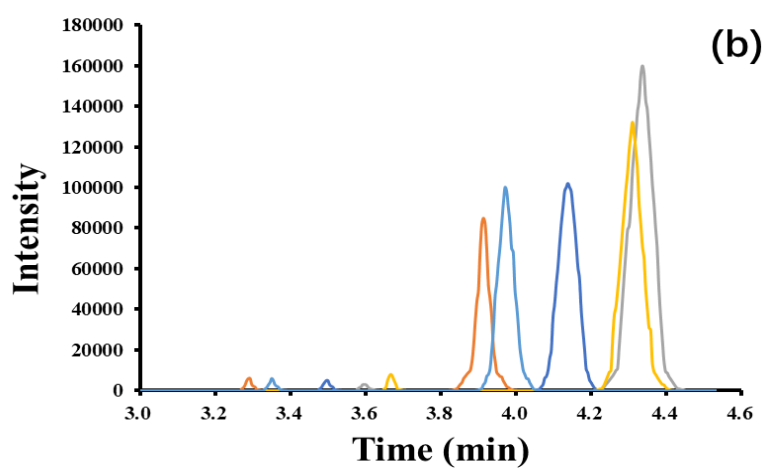

140

141 **Fig. S4** Chromatograms of EPM in S1 sample on the five columns of the first batche (A) and on the  
142 five columns of the different batches (B) samples spiked at  $0.1 \text{ mg kg}^{-1}$

143
